# Supplementary material for: How Children Become Sensitive to the Morphological Structure of the Words That They Read
Source: PubMed Central journal article supplement (PMC5591820; doi:10.3389/fpsyg.2017.01469), 2017-09-05
Supplement: Data_Sheet_1.pdf [file Data_Sheet_1.pdf]

**Appendix**

List of Derived Words Used in Reading Complex Words and their U Frequencies According to Zeno Word Frequency Guide (1995).

| Derived word | Base Word | Family Frequency | Family Size | Base Frequency | Surface Frequency | Semantic Relatedness | N Size of Derived Word | N Size of Base Word |
|--------------|-----------|------------------|-------------|----------------|-------------------|----------------------|------------------------|---------------------|
| adaptable    | adapt     | 34.22            | 25          | 9              | 1                 | .33                  | 1                      | 3                   |
| adjustable   | adjust    | 46.07            | 18          | 14             | 1                 | .57                  | 0                      | 0                   |
| alignment    | align     | 3.46             | 13          | 0.75           | 1                 | .56                  | 0                      | 1                   |
| ceaseless    | cease     | 14.41            | 8           | 3              | 1                 | .21                  | 0                      | 4                   |
| cleverness   | clever    | 2                | 2           | 18             | 1                 | .34                  | 0                      | 2                   |
| confinement  | confine   | 12.13            | 5           | 1              | 1                 | .10                  | 0                      | 1                   |
| cowardly     | coward    | 2.66             | 3           | 1              | 1                 | .29                  | 1                      | 3                   |
| cruelly      | cruel     | 4.04             | 4           | 13             | 1                 | .46                  | 3                      | 2                   |
| dampness     | damp      | 2.73             | 12          | 22             | 1                 | .26                  | 0                      | 10                  |
| densely      | dense     | 21.46            | 11          | 16             | 1                 | .30                  | 1                      | 3                   |
| diligently   | diligent  | 1                | 1           | 1              | 1                 | .31                  | 0                      | 0                   |
| engagement   | engage    | 27.92            | 10          | 8              | 2                 | .22                  | 0                      | 1                   |
| falsely      | false     | 2.63             | 10          | 21             | 1                 | .43                  | 0                      | 0                   |
| fateful      | fate      | 1.63             | 4           | 12             | 1                 | .37                  | 2                      | 20                  |
| fondness     | fond      | 2.75             | 5           | 13             | 1                 | .35                  | 0                      | 11                  |
| forgetful    | forget    | 8.5              | 7           | 58             | 1                 | .28                  | 0                      | 5                   |
| forgiveness  | forgive   | 2.95             | 7           | 5              | 1                 | .30                  | 0                      | 1                   |
| frightful    | fright    | 57.32            | 13          | 4              | 2                 | .30                  | 0                      | 4                   |
| generously   | generous  | 1.07             | 3           | 9              | 1                 | .29                  | 0                      | 0                   |
| gentleness   | gentle    | 70.61            | 16          | 33             | 1                 | .43                  | 0                      | 2                   |
| hateful      | hate      | 25.13            | 9           | 26             | 1                 | .32                  | 1                      | 23                  |
| locally      | local     | 4.9              | 12          | 107            | 1                 | .29                  | 2                      | 4                   |
| mournful     | mourn     | 6.54             | 8           | 1              | 1                 | .22                  | 0                      | 0                   |

| Derived word | Base Word  | Family Frequency | Family Size | Base Frequency | Surface Frequency | Semantic Relatedness | N Size of Derived Word | N Size of Base Word |
|--------------|------------|------------------|-------------|----------------|-------------------|----------------------|------------------------|---------------------|
| narrowly     | narrow     | 10.23            | 6           | 77             | 1                 | .11                  | 0                      | 7                   |
| nourishment  | nourish    | 5.98             | 11          | 0.9            | 3                 | .44                  | 0                      | 0                   |
| peculiarly   | peculiar   | 2.45             | 4           | 14             | 1                 | .34                  | 0                      | 0                   |
| purposeful   | purpose    | 40.99            | 11          | 113            | 1                 | .30                  | 0                      | 0                   |
| questionable | question   | 201.52           | 13          | 176            | 2                 | .13                  | 0                      | 0                   |
| relentless   | relent     | 2.62             | 5           | 0.05           | 1                 | .03                  | 0                      | 4                   |
| resentful    | resent     | 9.84             | 9           | 1              | 1                 | .10                  | 0                      | 4                   |
| respectful   | respect    | 36.65            | 19          | 47             | 2                 | .40                  | 0                      | 1                   |
| richness     | rich       | 29.76            | 12          | 122            | 1                 | .33                  | 0                      | 10                  |
| roughness    | rough      | 17.05            | 28          | 49             | 1                 | .44                  | 1                      | 9                   |
| senseless    | sense      | 49.24            | 7           | 145            | 1                 | .17                  | 0                      | 4                   |
| seriousness  | serious    | 25.02            | 3           | 84             | 2                 | .42                  | 0                      | 0                   |
| shyness      | shy        | 3.11             | 5           | 13             | 1                 | .49                  | 1                      | 14                  |
| slowness     | slow       | 230.73           | 9           | 88             | 1                 | .34                  | 0                      | 17                  |
| smoothness   | smooth     | 23.02            | 10          | 57             | 1                 | .53                  | 0                      | 1                   |
| soberly      | sober      | 1.66             | 5           | 3              | 1                 | .05                  | 0                      | 6                   |
| sorrowful    | sorrow     | 3.03             | 5           | 7              | 1                 | .60                  | 0                      | 3                   |
| sparsely     | sparse     | 2.02             | 2           | 1              | 2                 | .34                  | 0                      | 0                   |
| stainless    | stain      | 8.28             | 12          | 3              | 1                 | .11                  | 0                      | 7                   |
| stubbornly   | stubborn   | 2.43             | 2           | 5              | 2                 | .35                  | 0                      | 0                   |
| suspiciously | suspicious | 2.08             | 3           | 7              | 2                 | .24                  | 1                      | 2                   |
| truthful     | truth      | 4.62             | 8           | 61             | 1                 | .29                  | 0                      | 1                   |
| uniqueness   | unique     | 2                | 2           | 26             | 1                 | .67                  | 0                      | 0                   |
| urgently     | urgent     | 1                | 1           | 7              | 1                 | .27                  | 1                      | 0                   |
| weightless   | weight     | 21.35            | 22          | 112            | 1                 | .41                  | 0                      | 3                   |

Notes. N = Neighbourhood
